# Supplementary material for: VReedom: training for authorized leave of absence through virtual reality – a feasibility study
Source: Front Psychol. 2023 Sep 18;14:1231619. doi: 10.3389/fpsyg.2023.1231619 (PMC10544993; doi:10.3389/fpsyg.2023.1231619)
Supplement: Supplementary file 1 [file Table_1.XLSX]

## Sheet: Blad1
1. Recruitment capability and resulting sample characteristics		Codes that imply suitability for inclusion in new protocol	Codes that imply unsuitability for inclusion in new protocol
	1.1. Participant inclusion	●Engaging participants, curiosity and motivation in treatment adoption: participants were enthousiastic from the start on, as they were curious to know what the technology could mean to them (therapist 1), and they saw the treatment as game-like, which simultaneously increased motivation (therapist 2). None of the participants dropped out during the study period. (therapist 1, 2, 3). ● Providing …	● Delay in start of the training: there was, sometimes, a time gap between the introductory session and session 1 or some patients. This delay occurred because the patients were preoccupied with other activities during thse weeks. (therapist 2)
	1.2. Participant exclusion	● Critical psychiatric state as exclusion criterium: exclusion criteria such as high levels of aggression and critical psychiatric condition (like psychosis) should be maintained in any follow-up study (as it was already included as exclusion criterium), as it indicates that a patient is not yet ready for leave and therefore lacks short-term prospects. (therapist 1, 2)	No sentences related to this code section.
2. Data collection and evaluation procedures	2.1. Comprehensibility questionnaires	No sentences related to this code section.	● Simplify level of questioning in inquiries: to evaluative questions asked about specific emotions related to the session. These questions were often not fully understood, or misunderstood, due to their broad and abstract phrasing. For example: simplify the emotions you ask about. So, do not use 'disgust', but for example 'anger' or 'sadness'. Therefore, these questions are not suitable for the …
	2.2. Appropriateness questionnaires	● Post-session evaluation and de-brief: asking questions after each session ensured that there was oversight of the process and enabled patients to continue evaluating how they experienced the treatment. (therapist 1)	● Post session evaluation and de-brief: there was a need to allocate additional time for post-session debriefing, as it provides an opportunity to delve deeper into the patient's response to the therapy. This allows for a more comprehensive discussion on the effects of the therapy, encouraging patients to reflect on their experience. Questions such as "Why did you do it this way?" or "What could …
3. acceptability and suitability of training and protocol	3.1. Technical applicability of protocol	● Amount of triggers: the amount of triggers added during difficult sessions was evenly distributed (every 20 seconds). (therapist 2) ● Number of present avatars: the number of avatars adjusted to the difficulty level of the session appeared proportional and suitable. (therapist 1, 2, 3) ● Content of spoken texts by avatar: Sentences spoken to the patient by the avatars in the virtual environment…	● Content of spoken texts by avatar: Sometimes, the spoken sentences feeled very 'random' for the patients, as it didn't match the contextual situation of the patient at that moment. We could place more emphasis on role-playing instead of virtual avatars that simply call out and do not allow patients to respond. (therapist 1) ● Need for greater variety in locations: incorporate greater variety in…
	3.2. Contents of protocol	● Session program and sequence: the manual was comprehensible and feasible, and served as a guideline during the sessions. (therapist 1, 2, 3) ● Adherence to the main lines of the protocol by the therapists: main guidelines in the protocol were followed. (therapist 1, 2, 3) ● Optimizing session quantity - blancing patient readiness and engagement in treatment content: the content of the sessions …	● Enhance the opportunity for improvisation and personalization during therapy sessions: in situations where a patient may exhibit indifference towards a particular action, such as expressing disinterest in receiving adequate change at the cash register, it is important to have some flexibility in deviating from established protocols in order to maximize the potential benefits of the session. Due…
	3.3. Session duration and level of difficulty	● Duration of treatment sessions: the duration of the sessions, as described in the protocol, was manageablesessions almost never ran over time (with the exception of one instance), but exact durance differed per person, as every patient has different needs (therapist 1). Sessions (in general) weren't too short, and not too long. (therapist 1, 2)	● Duration of role play modules and 'walk around the supermarket': the duration of the role play modules could have been longer and the content more specific. Currently, the role plays are not being fully utilized to their potential as they mainly follow protocol. As a result, the conversations often end quickly and the content is not as challenging as it could be. Also, the duration of the super…
4. Training management & implementation	4.1. Therapists' expertise and abilities to conduct treatments	● Empowering therapeutic capabilities: due to the training provided at the start of the pilot, I felt capable of conducting the treatment (as long as there was technical support so that I could focus on the patient). (therapist 3) ● Therapist willingness for future session continuation: all therapists are open to conducting the sessions again in the future. (therapist 1, 2, 3) ● Focus solely on p…	● Enhancing therapist proficiency - allocating adequate practice time for equipment familiarization: in case there are no opportunities for technical assistance (through an assistant), plan more practice time for the therapists to become familiar with the equipment. This will make the use of the technology feel more comfortable during the sessions. (therapist 3) ● Tailoring treatment sessions for…
	4.2. Management of incidents	● Ensuring patient well-being and interdisciplinary communication - adverse event management and comprehensive documentation: during the treatment, no adverse events occurred, but if a patient required more attention after the session, sufficient one-on-one time was provided to discuss the session, and communication was established with and to the relevant treatment providers at the department wh…	No sentences related to this code section.
	4.3. Technology and equipment	● User friendliness of VR headset and accompanying computer: the use of the VR headset and computer was easy and intuitive, This can definitely be used again in the future, and there were no issues with it. (therapist 1, 2, 3) ● Access to technical assistance: as long as technical difficulties were resolved by research assistants, clinicians had the opportunity to maintain their focus on the pati…	● Enhance instruction clarity: sometimes, it was not possible to click on the arrows in the Wander program (during the tour around the clinic), but this was due to equipment issues rather than the patient. This could often be resolved by clicking in another location, but clearer instructions should be provided. (therapist 1) ● Dependence on technical assistance: without the assistant, it would no…
	4.4. Opportunities provided by employer and work environment provided	● Ensuring prerequisites for successful VR treatment - organizational imperatives and therapist investment: as long as providing VR treatments counts as providing regular treatment, and there will be allocated hours for it in therapists' workweek, therapists can invest enough time and attention into it. Therefore, it is crucial to ensure that these prerequisites are well-organized, as they are es…	● Involvement of the entire treatment team on a daily basis: sometimes, the treatment team was surprised when a patient was taken from the department, indicating that there were still some communication issues that needed to be resolved. (therapist 3) ● Enhance patient-caregiver collaboration: involve the patient's personal caregiver even more in the development of a personalized treatment plan t…
5. Preliminary participant results	5.1. Suitability for different target populations	● Targeted treatment benefits - addressing specific treatment goals for optimal patient outcomes: Patients with a specific treatment goal, such as fear of being alone or fear of being in crowded places, were found to benefit the most from this particular treatment. (therapist 1) ● Suitability for tbs-measure population: patients with an enforced court-ordered tbs measure seem to respond particula…	● Lower interest in training amongst conditional tbs-measure population: patients with conditional sentence titles who were approached did sometimes not want to cooperate. Also, they had not been disconnected from society for a long time, indicating that a preparation for life outside the walls of the clinic may be less necessary. They also seemed generally less interested in participating than t…
	5.2. Relatability and immersiveness	● The efficacy of personalization as a means to address an individual's unique context: it is best to tailor a role-play as much as possible to the individual. When this was the case (when the protocol was not followed), a lot more emotion was released by the patient and boundaries were touched, because the conversation felt a lot more authentic. (therapist 2, 3) ● Translation of first temporal l…	● Need for more options to tailor the session completely to the patient: there need to be more possibilities to (beforehand) plan a session entirely to the patient's specific needs. What the content of the session needs to be depends on the client. For example, one patient had a strong desire to discuss it further and could benefit from a longer session. Another patient was less talkative. (thera…
